# Supplementary material for: Phenotypic modifications in ovarian cancer stem cells following Paclitaxel treatment
Source: PubMed Central journal article supplement (PMC3892380; doi:10.1002/cam4.115), 2013-08-27

## **Legends to Supplementary Figures**

**Supplementary Fig. 1.** Primary and recurrent EOC tumors obtained from mouse xenograft are morphologically distinct and parallels the difference observed in patient samples.

**Supplementary Fig. 2.** OCSC1 overexpressing GFP or Slug were treated with Paclitaxel. Note that overexpression of Slug yields more resistant cultures.



# Supp. Fig. 1

## Primary Tumor

## Recurrent tumor

Mouse

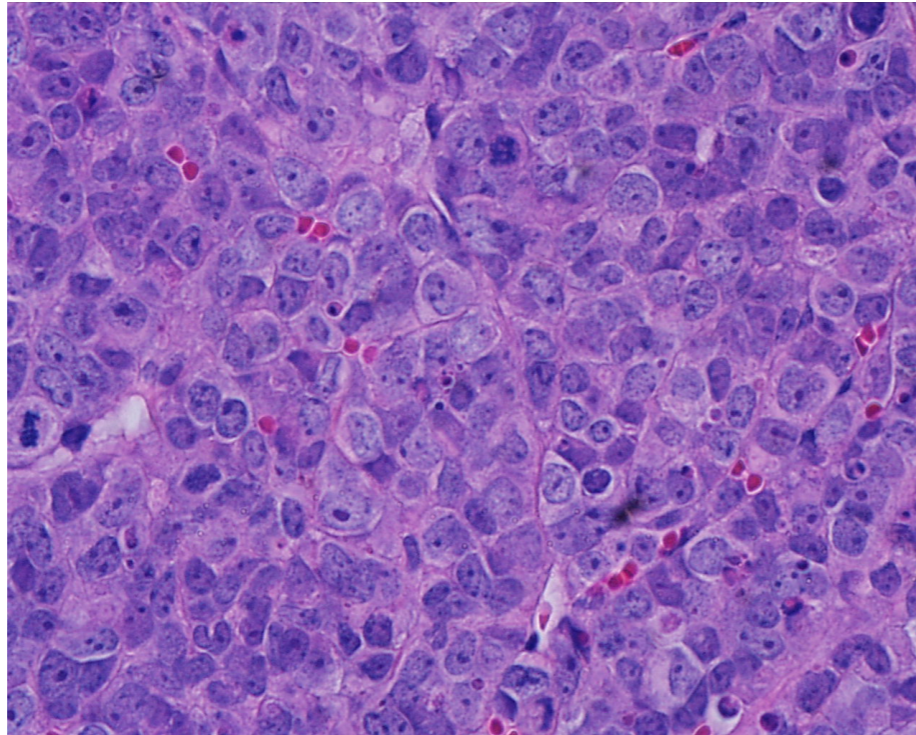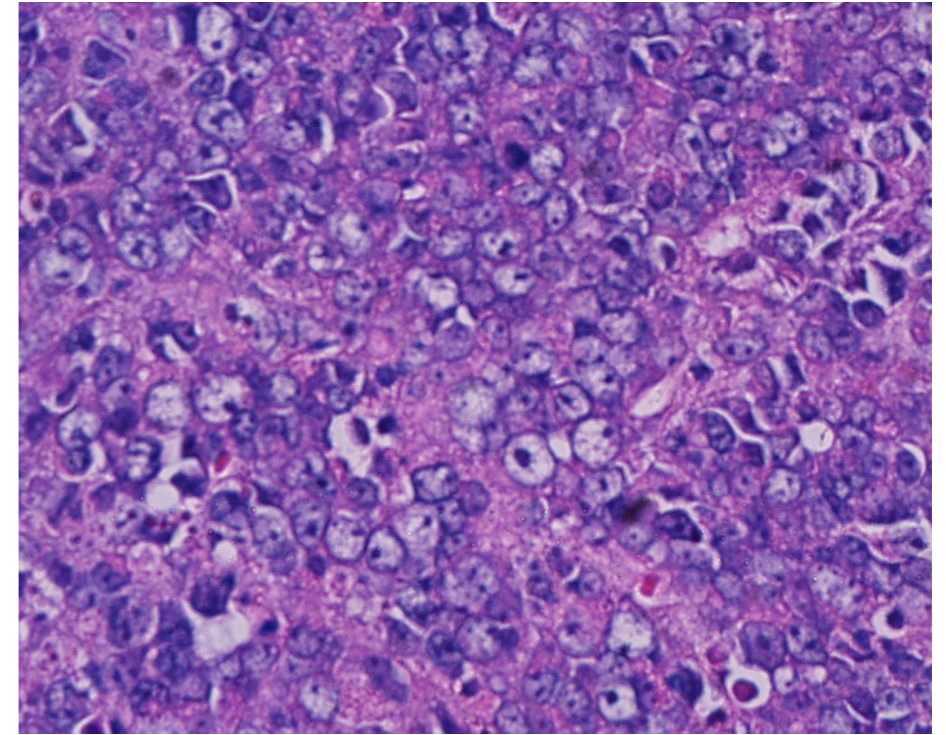

## Primary Tumor

## Recurrent tumor

Human

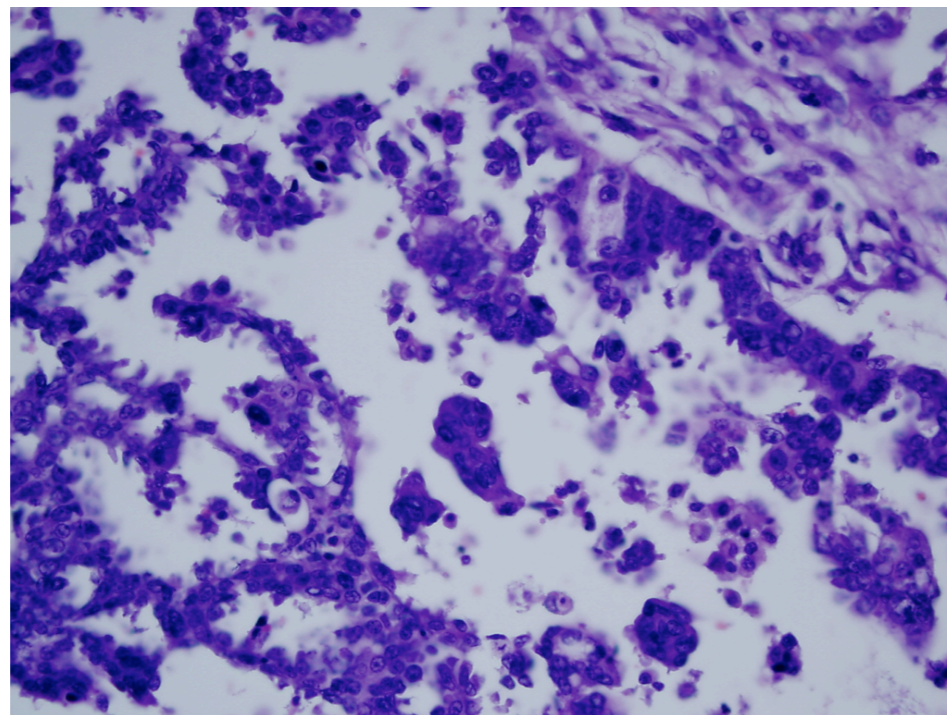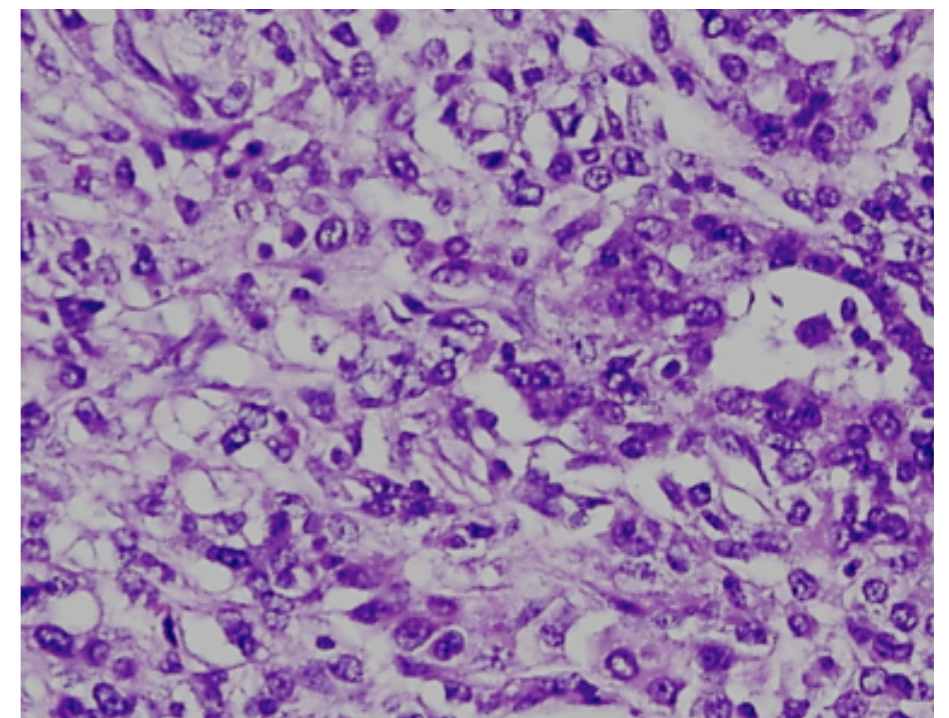



# Supp. Fig. 2

## GFP overexpression

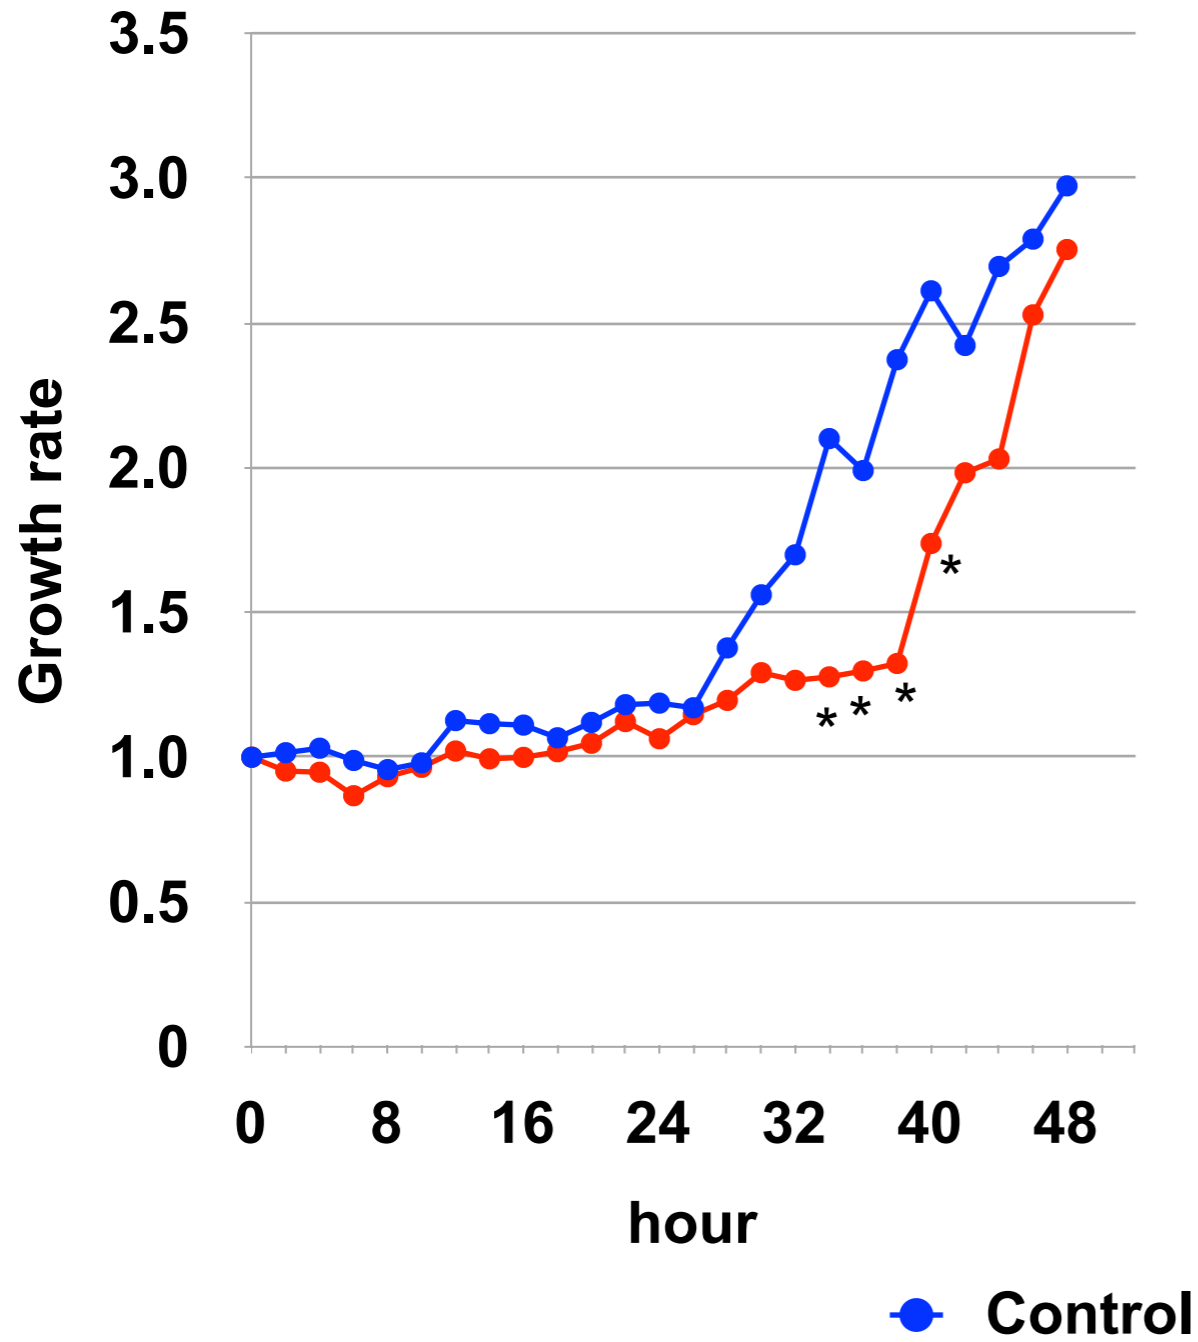

## SLUG overexpression

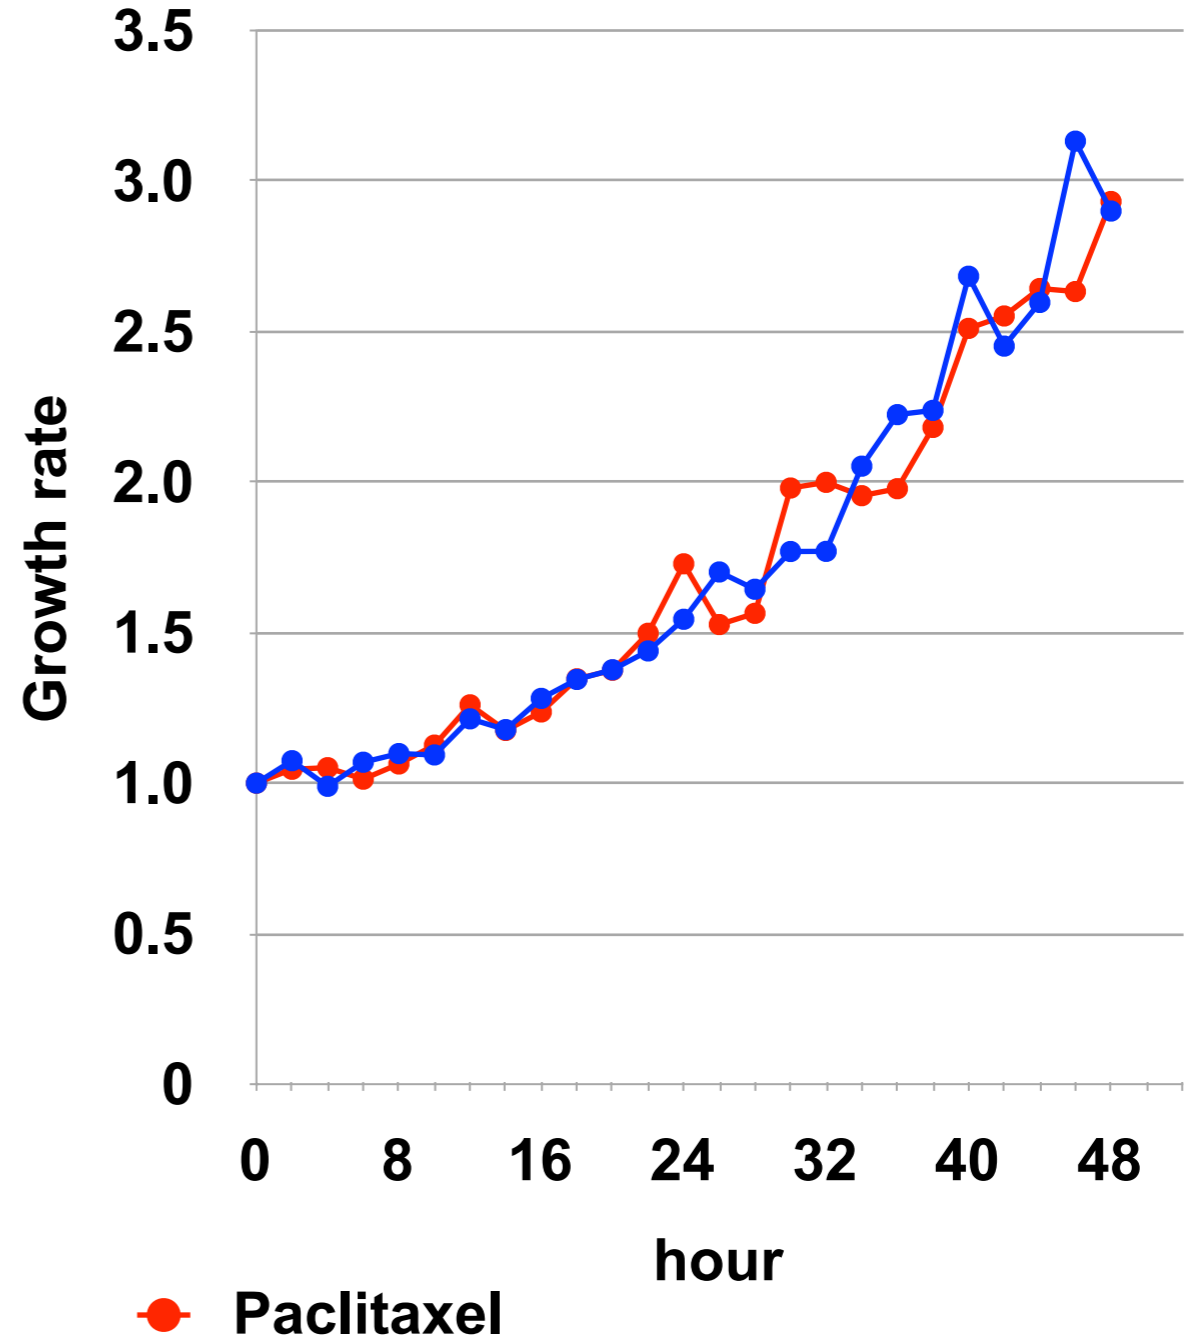

Supplement: cam40002-0751-SD1.pdf [file cam40002-0751-SD1.pdf]
